# Supplementary material for: Chemical Composition of PM2.5 in Wood Fire and LPG Cookstove Homes of Nepali Brick Workers
Source: MDPI journal article supplement (doi:10.3390/atmos12070911), 2021-07-15
Supplement: s1 [file s1]

# Chemical Composition of PM<sub>2.5</sub> in Wood Fire and LPG Cookstove Homes of Nepali Brick Workers

James D. Johnston <sup>1,\*</sup>, John D. Beard <sup>1</sup>, Emma J. Montague <sup>1</sup>, Seshananda Sanjel <sup>2</sup>, James H. Lu <sup>1</sup>, Haley McBride <sup>1</sup>, Frank X. Weber <sup>3</sup> and Ryan T. Chartier <sup>3</sup>

<sup>1</sup> Department of Public Health, Brigham Young University, Provo, UT 84602, USA; john\_beard@byu.edu (J.D.B.); montagueemma19@gmail.com (E.J.M.); luhua jr@gmail.com (J.H.L.); haleylucille82@gmail.com (H.M.)

<sup>2</sup> Department of Community Medicine & Public Health, Karnali Academy of Health Sciences, Jumla 21200, Nepal; seshanandasanjel24@gmail.com

<sup>3</sup> RTI International, Research Triangle Park, NC 27709, USA; fxw@rti.org (F.X.W.); rchartier@rti.org (R.T.C.)

\* Correspondence: james\_johnston@byu.edu; Tel.: +1-801-422-4226

**Table S1.** Associations between the mean of samples inside<sup>a</sup> homes and home area and number of people in home at a brick kiln in Bhaktapur, Nepal, May 2019.

| PM <sub>2.5</sub> Chemical Component, µg/m <sup>3</sup> | Home area <sup>b</sup> , m <sup>2</sup> |                           |                     |                            |                     |                            | Number of people in home |                    |                           |                      |
|---------------------------------------------------------|-----------------------------------------|---------------------------|---------------------|----------------------------|---------------------|----------------------------|--------------------------|--------------------|---------------------------|----------------------|
|                                                         | 5.41-9.50                               |                           | > 9.50-10.67        |                            | > 10.67-31.40       |                            | p-value <sup>c</sup>     | GMR <sup>c,d</sup> | 95% CI <sup>c,d</sup>     | p-value <sup>c</sup> |
|                                                         | GM <sup>c</sup>                         | 95% CI <sup>c</sup>       | GM <sup>c</sup>     | 95% CI <sup>c</sup>        | GM <sup>c</sup>     | 95% CI <sup>c</sup>        |                          |                    |                           |                      |
| Al                                                      | 0.84                                    | 0.27, 2.62                | 0.17                | 0.048, 0.61                | 0.15                | 0.042, 0.51                | 0.08                     | 0.86               | 0.50, 1.47                | 0.58                 |
| As                                                      | 1.00                                    | Reference                 | 1.22 <sup>e</sup>   | 0.013, 117.50 <sup>e</sup> | 1.20 <sup>e,f</sup> | 0.00, 22.80 <sup>e,f</sup> | NA                       | 0.85 <sup>e</sup>  | 0.19, 2.50 <sup>e</sup>   | NA                   |
| Ba                                                      | 0.032                                   | 0.012, 0.085              | 0.015               | 0.0048, 0.047              | 0.0061              | 0.0017, 0.022              | 0.13                     | 0.92               | 0.55, 1.56                | 0.77                 |
| BC                                                      | 66.45                                   | 11.71, 376.98             | 13.02               | 2.24, 75.75                | 7.93                | 1.41, 44.50                | 0.20                     | 0.75               | 0.37, 1.52                | 0.43                 |
| Br                                                      | 0.035 <sup>g</sup>                      | 0.020, 0.059 <sup>g</sup> | 0.023 <sup>g</sup>  | 0.013, 0.042 <sup>g</sup>  | 0.015 <sup>g</sup>  | 0.0084, 0.027 <sup>g</sup> | 0.11 <sup>g</sup>        | 0.94 <sup>g</sup>  | 0.73, 1.20 <sup>g</sup>   | 0.58 <sup>g</sup>    |
| BrC                                                     | 14.67 <sup>g</sup>                      | 9.76, 22.06 <sup>g</sup>  | 10.65 <sup>g</sup>  | 7.48, 15.17 <sup>g</sup>   | 12.68 <sup>g</sup>  | 9.24, 17.39 <sup>g</sup>   | 0.43 <sup>g</sup>        | 0.98 <sup>g</sup>  | 0.86, 1.12 <sup>g</sup>   | 0.74 <sup>g</sup>    |
| Cs                                                      | 0.010                                   | 0.0054, 0.020             | 0.0086              | 0.0042, 0.017              | 0.0037              | 0.0016, 0.0084             | 0.13                     | 0.94               | 0.67, 1.30                | 0.69                 |
| Ca                                                      | 0.49 <sup>g</sup>                       | 0.12, 2.03 <sup>g</sup>   | 0.14 <sup>g</sup>   | 0.029, 0.65 <sup>g</sup>   | 0.070 <sup>g</sup>  | 0.015, 0.33 <sup>g</sup>   | 0.16 <sup>g</sup>        | 0.80 <sup>g</sup>  | 0.43, 1.51 <sup>g</sup>   | 0.47 <sup>g</sup>    |
| Ce                                                      | 1.00                                    | Reference                 | 1.20 <sup>e,f</sup> | 0.00, 22.80 <sup>e,f</sup> | 1.20 <sup>e,f</sup> | 0.00, 22.80 <sup>e,f</sup> | NA                       | 0.38 <sup>e</sup>  | 0.0051, 2.67 <sup>e</sup> | NA                   |
| Cl                                                      | 2.95 <sup>g</sup>                       | 0.60, 14.48 <sup>g</sup>  | 0.25 <sup>g</sup>   | 0.044, 1.43 <sup>g</sup>   | 0.14 <sup>g</sup>   | 0.024, 0.77 <sup>g</sup>   | 0.03 <sup>g,h</sup>      | 0.63 <sup>g</sup>  | 0.29, 1.36 <sup>g</sup>   | 0.22 <sup>g</sup>    |
| Cr                                                      | 0.0027                                  | 0.0015, 0.0048            | 0.0022              | 0.0011, 0.0046             | 0.00095             | 0.00036, 0.0025            | 0.17                     | 0.97               | 0.69, 1.36                | 0.86                 |
| Co                                                      | 1.00                                    | Reference                 | 1.22 <sup>e</sup>   | 0.013, 117.50 <sup>e</sup> | 1.20 <sup>e,f</sup> | 0.00, 22.80 <sup>e,f</sup> | NA                       | 0.85 <sup>e</sup>  | 0.19, 2.50 <sup>e</sup>   | NA                   |
| Cu                                                      | 0.013                                   | 0.0065, 0.025             | 0.0024              | 0.0010, 0.0059             | 0.0035              | 0.0016, 0.0075             | 0.005 <sup>i</sup>       | 0.77               | 0.54, 1.10                | 0.15                 |
| Fe                                                      | 0.66 <sup>g</sup>                       | 0.18, 2.45 <sup>g</sup>   | 0.17 <sup>g</sup>   | 0.041, 0.72 <sup>g</sup>   | 0.11 <sup>g</sup>   | 0.026, 0.46 <sup>g</sup>   | 0.15 <sup>g</sup>        | 0.83 <sup>g</sup>  | 0.46, 1.49 <sup>g</sup>   | 0.51 <sup>g</sup>    |
| Pb                                                      | 0.026                                   | 0.013, 0.053              | 0.0073              | 0.0030, 0.018              | 0.011               | 0.0049, 0.025              | 0.07                     | 0.77               | 0.54, 1.12                | 0.17                 |
| Mg                                                      | 0.065                                   | 0.023, 0.19               | 0.021               | 0.0061, 0.069              | 0.019               | 0.0057, 0.060              | 0.21                     | 0.94               | 0.56, 1.57                | 0.80                 |
| Mn                                                      | 0.018                                   | 0.0058, 0.054             | 0.0045              | 0.0011, 0.018              | 0.0050              | 0.0014, 0.017              | 0.20                     | 0.94               | 0.56, 1.59                | 0.81                 |
| Ni                                                      | 0.0023                                  | 0.0016, 0.0033            | 0.0016              | 0.0010, 0.0025             | 0.0011              | 0.00067, 0.0020            | 0.08                     | 0.92               | 0.75, 1.13                | 0.43                 |
| P                                                       | 0.023                                   | 0.0090, 0.060             | 0.0081              | 0.0027, 0.024              | 0.0056              | 0.0018, 0.017              | 0.13                     | 0.79               | 0.49, 1.27                | 0.33                 |
| K                                                       | 2.35 <sup>g</sup>                       | 1.06, 5.20 <sup>g</sup>   | 1.24 <sup>g</sup>   | 0.52, 2.95 <sup>g</sup>    | 1.17 <sup>g</sup>   | 0.49, 2.79 <sup>g</sup>    | 0.38 <sup>g</sup>        | 0.93 <sup>g</sup>  | 0.67, 1.30 <sup>g</sup>   | 0.66 <sup>g</sup>    |
| Rb                                                      | 0.0094                                  | 0.0035, 0.025             | 0.0022              | 0.00049, 0.0099            | 0.0024              | 0.00064, 0.0088            | 0.15                     | 0.84               | 0.49, 1.45                | 0.54                 |
| Se                                                      | 0.0039                                  | 0.0029, 0.0054            | 0.0032              | 0.0020, 0.0051             | 0.00029             | j                          | 0.75                     | 0.96               | 0.80, 1.15                | 0.63                 |
| Si                                                      | 2.22 <sup>g</sup>                       | 0.82, 6.01 <sup>g</sup>   | 0.79 <sup>g</sup>   | 0.27, 2.36 <sup>g</sup>    | 0.57 <sup>g</sup>   | 0.19, 1.69 <sup>g</sup>    | 0.15 <sup>g</sup>        | 0.91 <sup>g</sup>  | 0.58, 1.43 <sup>g</sup>   | 0.67 <sup>g</sup>    |
| Na                                                      | 0.075                                   | 0.037, 0.15               | 0.15                | 0.070, 0.31                | 0.16                | 0.077, 0.34                | 0.26                     | 1.14               | 0.85, 1.53                | 0.39                 |
| Sr                                                      | 1.00                                    | Reference                 | 1.20 <sup>e,f</sup> | 0.063, ∞ <sup>e,f</sup>    | k                   | k                          | NA                       | 1.31 <sup>e</sup>  | 0.24, 5.57 <sup>e</sup>   | NA                   |
| S                                                       | 3.43 <sup>g</sup>                       | 2.37, 4.97 <sup>g</sup>   | 2.28 <sup>g</sup>   | 1.52, 3.42 <sup>g</sup>    | 2.80 <sup>g</sup>   | 1.87, 4.20 <sup>g</sup>    | 0.31 <sup>g</sup>        | 0.97 <sup>g</sup>  | 0.83, 1.13 <sup>g</sup>   | 0.66 <sup>g</sup>    |
| Ti                                                      | 0.061                                   | 0.017, 0.21               | 0.015               | 0.0037, 0.058              | 0.0074              | 0.0018, 0.030              | 0.08                     | 0.82               | 0.45, 1.49                | 0.51                 |
| V                                                       | 0.0035                                  | 0.0014, 0.0088            | 0.0019              | 0.00063, 0.0058            | 0.0011              | 0.00033, 0.0034            | 0.26                     | 0.85               | 0.52, 1.39                | 0.51                 |
| Zn                                                      | 0.099 <sup>g</sup>                      | 0.047, 0.21 <sup>g</sup>  | 0.038 <sup>g</sup>  | 0.017, 0.084 <sup>g</sup>  | 0.054 <sup>g</sup>  | 0.024, 0.12 <sup>g</sup>   | 0.19 <sup>g</sup>        | 0.91 <sup>g</sup>  | 0.65, 1.25 <sup>g</sup>   | 0.52 <sup>g</sup>    |

Abbreviations: Al, aluminum; As, arsenic; Ba, barium; BC, black carbon; Br, bromine; BrC, brown carbon; Cs, caesium; Ca, calcium; Ce, cerium; Cl, chlorine; Cr, chromium; Co, cobalt; CI, confidence interval; Cu, copper; GM, geometric mean; GMR, geometric mean ratio; Fe, iron; Pb, lead; Mg, magnesium; Mn, manganese;

Ni, nickel; NA, not applicable; PM<sub>2.5</sub>, particulate matter with an aerodynamic diameter less than 2.5 µm; P, phosphorus; K, potassium; Rb, rubidium; Se, selenium; Si, silicon; Na, sodium; Sr, strontium; S, sulfur; Ti, titanium; V, vanadium; Zn, zinc.

<sup>a</sup> The filter of one sample tore and could not be analyzed, so the home from whence that sample came was excluded from analyses.

<sup>b</sup> Categories based on tertiles.

<sup>c</sup> Estimated via simple (i.e., unadjusted) Tobit regression models of the natural logarithm transformed values.

<sup>d</sup> Exponentiated regression coefficient and 95% CI (i.e., GM PM<sub>2.5</sub> chemical component concentration ratio for a specified change in the independent variable or  $\exp(\beta) - 1$  = percent change in GM PM<sub>2.5</sub> chemical component concentration for a specified change in the independent variable).

<sup>e</sup> Exact odds ratio and 95% CI; estimated via simple (i.e., unadjusted) exact unconditional logistic regression models.

<sup>f</sup> Median unbiased estimate.

<sup>g</sup> Estimated via simple (i.e., unadjusted) linear regression models of the natural logarithm transformed values.

<sup>h</sup> Using the Tukey method to adjust for multiple comparisons, p-values for tests of pairwise differences among categories of home area were as follows: 5.41-9.50 vs. > 9.50-10.67: 0.10, 5.41-9.50 vs. > 10.67-31.40: 0.04, and > 9.50-10.67 vs. > 10.67-31.40: 0.85.

<sup>i</sup> Using the Tukey-Kramer method to adjust for multiple comparisons, p-values for tests of pairwise differences among categories of home area were as follows: 5.41-9.50 vs. > 9.50-10.67: 0.01, 5.41-9.50 vs. > 10.67-31.40: 0.03, and > 9.50-10.67 vs. > 10.67-31.40: 0.82.

<sup>j</sup> Unable to estimate.

<sup>k</sup> Degenerate, unable to estimate.

**Table S2.** Associations between the mean of samples inside<sup>a</sup> homes and occupant density and number of children in home at a brick kiln in Bhaktapur, Nepal, May 2019.

| PM <sub>2.5</sub> Chemical Component,<br>µg/m <sup>3</sup> | Occupant density, number of people/100 m <sup>2</sup> |                         |                      | Number of children in home |                           |                      |                             |                      |
|------------------------------------------------------------|-------------------------------------------------------|-------------------------|----------------------|----------------------------|---------------------------|----------------------|-----------------------------|----------------------|
|                                                            | GMR <sup>b, c</sup>                                   | 95% CI <sup>b, c</sup>  | p-value <sup>b</sup> | 0-1                        |                           | 2-3                  |                             | p-value <sup>b</sup> |
|                                                            |                                                       |                         |                      | GM <sup>b</sup>            | 95% CI <sup>b</sup>       | GM <sup>b</sup>      | 95% CI <sup>b</sup>         |                      |
| Al                                                         | 1.02                                                  | 0.97, 1.07              | 0.39                 | 0.37                       | 0.14, 1.01                | 0.20                 | 0.053, 0.75                 | 0.47                 |
| As                                                         | 1.00 <sup>d</sup>                                     | 0.91, 1.09 <sup>d</sup> | NA                   | 1.00                       | Reference                 | 0.65 <sup>d, e</sup> | 0.00, 5.81 <sup>d, e</sup>  | NA                   |
| Ba                                                         | 1.02                                                  | 0.98, 1.07              | 0.26                 | 0.017                      | 0.0066, 0.042             | 0.012                | 0.0034, 0.042               | 0.67                 |
| BC                                                         | 1.02                                                  | 0.96, 1.09              | 0.52                 | 33.72                      | 8.97, 126.71              | 8.53                 | 1.65, 44.07                 | 0.20                 |
| Br                                                         | 1.01 <sup>f</sup>                                     | 0.99, 1.03 <sup>f</sup> | 0.37 <sup>f</sup>    | 0.025 <sup>f</sup>         | 0.016, 0.040 <sup>f</sup> | 0.022 <sup>f</sup>   | 0.012, 0.039 <sup>f</sup>   | 0.69 <sup>f</sup>    |
| BrC                                                        | 1.00 <sup>f</sup>                                     | 0.99, 1.01 <sup>f</sup> | 0.93 <sup>f</sup>    | 12.67 <sup>f</sup>         | 9.64, 16.64 <sup>f</sup>  | 12.06 <sup>f</sup>   | 8.73, 16.65 <sup>f</sup>    | 0.80 <sup>f</sup>    |
| Cs                                                         | 1.01                                                  | 0.99, 1.04              | 0.39                 | 0.0079                     | 0.0044, 0.014             | 0.0058               | 0.0026, 0.013               | 0.54                 |
| Ca                                                         | 1.02 <sup>f</sup>                                     | 0.96, 1.08 <sup>f</sup> | 0.52 <sup>f</sup>    | 0.24 <sup>f</sup>          | 0.075, 0.79 <sup>f</sup>  | 0.11 <sup>f</sup>    | 0.023, 0.49 <sup>f</sup>    | 0.38 <sup>f</sup>    |
| Ce                                                         | 0.96 <sup>d</sup>                                     | 0.76, 1.10 <sup>d</sup> | NA                   | 1.00                       | Reference                 | 1.67 <sup>d, e</sup> | 0.00, 31.67 <sup>d, e</sup> | NA                   |
| Cl                                                         | 1.02 <sup>f</sup>                                     | 0.94, 1.09 <sup>f</sup> | 0.63 <sup>f</sup>    | 0.82 <sup>f</sup>          | 0.19, 3.62 <sup>f</sup>   | 0.24 <sup>f</sup>    | 0.036, 1.63 <sup>f</sup>    | 0.29 <sup>f</sup>    |
| Cr                                                         | 1.02                                                  | 1.00, 1.05              | 0.08                 | 0.0017                     | 0.00094, 0.0031           | 0.0020               | 0.00090, 0.0046             | 0.72                 |
| Co                                                         | 1.00 <sup>d</sup>                                     | 0.91, 1.09 <sup>d</sup> | NA                   | 1.00                       | Reference                 | 0.65 <sup>d, e</sup> | 0.00, 5.81 <sup>d, e</sup>  | NA                   |
| Cu                                                         | 1.01                                                  | 0.98, 1.04              | 0.57                 | 0.0061                     | 0.0030, 0.012             | 0.0036               | 0.0014, 0.0093              | 0.38                 |
| Fe                                                         | 1.02 <sup>f</sup>                                     | 0.97, 1.07 <sup>f</sup> | 0.46 <sup>f</sup>    | 0.31 <sup>f</sup>          | 0.10, 0.94 <sup>f</sup>   | 0.17 <sup>f</sup>    | 0.041, 0.71 <sup>f</sup>    | 0.48 <sup>f</sup>    |
| Pb                                                         | 1.01                                                  | 0.98, 1.04              | 0.70                 | 0.017                      | 0.0088, 0.031             | 0.0096               | 0.0039, 0.023               | 0.32                 |
| Mg                                                         | 1.02                                                  | 0.97, 1.06              | 0.54                 | 0.032                      | 0.012, 0.080              | 0.028                | 0.0081, 0.094               | 0.86                 |
| Mn                                                         | 1.02                                                  | 0.98, 1.07              | 0.37                 | 0.0091                     | 0.0034, 0.024             | 0.0058               | 0.0016, 0.021               | 0.59                 |
| Ni                                                         | 1.00                                                  | 0.98, 1.02              | 0.87                 | 0.0017                     | 0.0012, 0.0025            | 0.0014               | 0.00081, 0.0025             | 0.57                 |
| P                                                          | 1.01                                                  | 0.97, 1.05              | 0.65                 | 0.013                      | 0.0055, 0.030             | 0.0079               | 0.0026, 0.024               | 0.50                 |
| K                                                          | 1.01 <sup>f</sup>                                     | 0.98, 1.04 <sup>f</sup> | 0.41 <sup>f</sup>    | 1.86 <sup>f</sup>          | 1.01, 3.42 <sup>f</sup>   | 1.14 <sup>f</sup>    | 0.52, 2.50 <sup>f</sup>     | 0.31 <sup>f</sup>    |
| Rb                                                         | 1.02                                                  | 0.97, 1.06              | 0.44                 | 0.0053                     | 0.0021, 0.013             | 0.0023               | 0.00058, 0.0093             | 0.30                 |
| Se                                                         | 1.01                                                  | 0.99, 1.02              | 0.58                 | 0.0028                     | 0.0019, 0.0041            | 0.0036               | 0.0023, 0.0055              | 0.32                 |
| Si                                                         | 1.02                                                  | 0.98, 1.06 <sup>f</sup> | 0.35 <sup>f</sup>    | 1.14 <sup>f</sup>          | 0.49, 2.67 <sup>f</sup>   | 0.92 <sup>f</sup>    | 0.31, 2.76 <sup>f</sup>     | 0.75 <sup>f</sup>    |
| Na                                                         | 0.99                                                  | 0.97, 1.02              | 0.62                 | 0.12                       | 0.068, 0.21               | 0.12                 | 0.055, 0.24                 | 0.94                 |
| Sr                                                         | 1.01 <sup>d</sup>                                     | 0.87, 1.13 <sup>d</sup> | NA                   | 1.00                       | Reference                 | 1.67 <sup>d, e</sup> | 0.00, 31.67 <sup>d, e</sup> | NA                   |
| S                                                          | 1.00 <sup>f</sup>                                     | 0.99, 1.02 <sup>f</sup> | 0.57 <sup>f</sup>    | 3.11 <sup>f</sup>          | 2.33, 4.14 <sup>f</sup>   | 2.44 <sup>f</sup>    | 1.68, 3.53 <sup>f</sup>     | 0.29 <sup>f</sup>    |
| Ti                                                         | 1.03                                                  | 0.97, 1.08              | 0.36                 | 0.026                      | 0.0085, 0.078             | 0.013                | 0.0031, 0.057               | 0.48                 |
| V                                                          | 1.02                                                  | 0.98, 1.06              | 0.41                 | 0.0022                     | 0.00096, 0.0053           | 0.0014               | 0.00041, 0.0050             | 0.54                 |
| Zn                                                         | 1.01 <sup>f</sup>                                     | 0.98, 1.04 <sup>f</sup> | 0.50 <sup>f</sup>    | 0.072 <sup>f</sup>         | 0.039, 0.13 <sup>f</sup>  | 0.046 <sup>f</sup>   | 0.021, 0.099 <sup>f</sup>   | 0.34 <sup>f</sup>    |

Abbreviations: Al, aluminum; As, arsenic; Ba, barium; BC, black carbon; Br, bromine; BrC, brown carbon; Cs, caesium; Ca, calcium; Ce, cerium; Cl, chlorine; Cr, chromium; Co, cobalt; CI, confidence interval; Cu, copper; GM, geometric mean; GMR, geometric mean ratio; Fe, iron; Pb, lead; Mg, magnesium; Mn, manganese; Ni, nickel; NA, not applicable; PM<sub>2.5</sub>, particulate matter with an aerodynamic diameter less than 2.5 µm; P, phosphorus; K, potassium; Rb, rubidium; Se, selenium; Si, silicon; Na, sodium; Sr, strontium; S, sulfur; Ti, titanium; V, vanadium; Zn, zinc.

<sup>a</sup> The filter of one sample tore and could not be analyzed, so the home from whence that sample came was excluded from analyses.

<sup>b</sup> Estimated via simple (i.e., unadjusted) Tobit regression models of the natural logarithm transformed values.

<sup>c</sup> Exponentiated regression coefficient and 95% CI (i.e., GM PM<sub>2.5</sub> chemical component concentration ratio for a specified change in the independent variable or  $\exp(\beta) - 1$  = percent change in GM PM<sub>2.5</sub> chemical component concentration for a specified change in the independent variable).

<sup>d</sup> Exact odds ratio and 95% CI; estimated via simple (i.e., unadjusted) exact unconditional logistic regression models.

<sup>e</sup> Median unbiased estimate.

<sup>f</sup> Estimated via simple (i.e., unadjusted) linear regression models of the natural logarithm transformed values.

**Table S3.** Associations between the mean of samples inside<sup>a</sup> homes and home area, smokers in home, number of smokers in home, and fuel type mutually adjusted for each other at a brick kiln in Bhaktapur, Nepal, May 2019.

| PM <sub>2.5</sub> Chemical Component | Home area, m <sup>2</sup> | Smokers in home      | Number of smokers in home | Fuel type            |
|--------------------------------------|---------------------------|----------------------|---------------------------|----------------------|
|                                      | p-value <sup>b</sup>      | p-value <sup>b</sup> | p-value <sup>b</sup>      | p-value <sup>b</sup> |
| Cl                                   | 0.29 <sup>c</sup>         | 0.0005 <sup>c</sup>  |                           |                      |
| Cl                                   | 0.02 <sup>c</sup>         |                      | 0.005 <sup>c</sup>        |                      |
| Cl                                   | 0.47 <sup>c</sup>         |                      |                           | 0.02 <sup>c</sup>    |
| Cl                                   | 0.58 <sup>c</sup>         | 0.005 <sup>c</sup>   |                           | 0.17 <sup>c</sup>    |
| Cl                                   | 0.19 <sup>c</sup>         |                      | 0.10 <sup>c</sup>         | 0.43 <sup>c</sup>    |
| Cu                                   | 0.03                      | < 0.0001             |                           |                      |
| Cu                                   | 0.002                     |                      | 0.02                      |                      |
| Cu                                   | 0.10                      |                      |                           | 0.02                 |
| Cu                                   | 0.05                      | 0.0009               |                           | 0.36                 |
| Cu                                   | 0.06                      |                      | 0.22                      | 0.44                 |

Abbreviations: Cl, chlorine; Cu, copper; PM<sub>2.5</sub>, particulate matter with an aerodynamic diameter less than 2.5 µm.

<sup>a</sup> The filter of one sample tore and could not be analyzed, so the home from whence that sample came was excluded from analyses.

<sup>b</sup> Estimated via multivariable Tobit regression models of the natural logarithm transformed values adjusted for home area, smokers in home, number of smokers in home, and/or fuel type.

<sup>c</sup> Estimated via multivariable linear regression models of the natural logarithm transformed values adjusted for home area, smokers in home, number of smokers in home, and/or fuel type.
